# Supplementary material for: Analytical Methodology for Trace Determination of Propoxur and Fenitrothion Pesticide Residues by Decanoic Acid Modified Magnetic Nanoparticles
Source: MDPI journal article supplement (doi:10.3390/molecules24244621), 2019-12-17
Supplement: s1 [file s1]

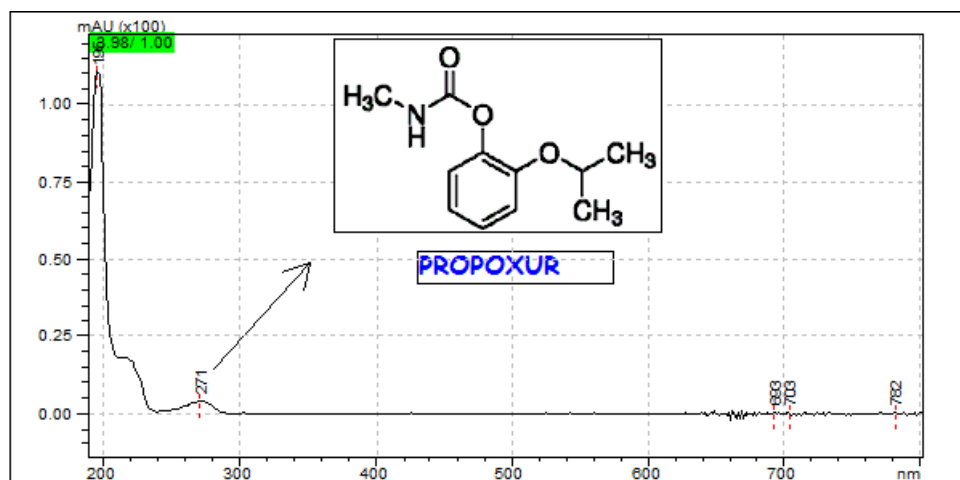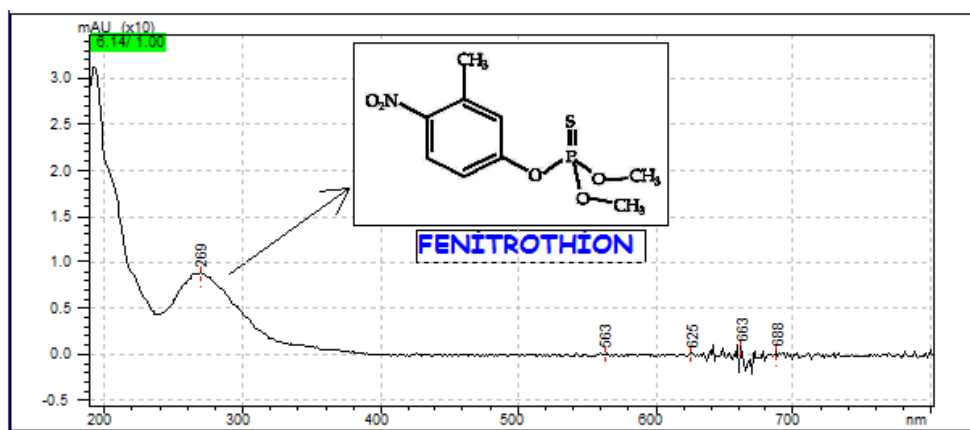

S1. Absorption spectrum of PRO and FEN obtained from DAD detector
